# Supplementary material
Source: MDPI journal article supplement (https://www.mdpi.com/2673-4591/31/1/62)
Supplement: s1 [file s1]

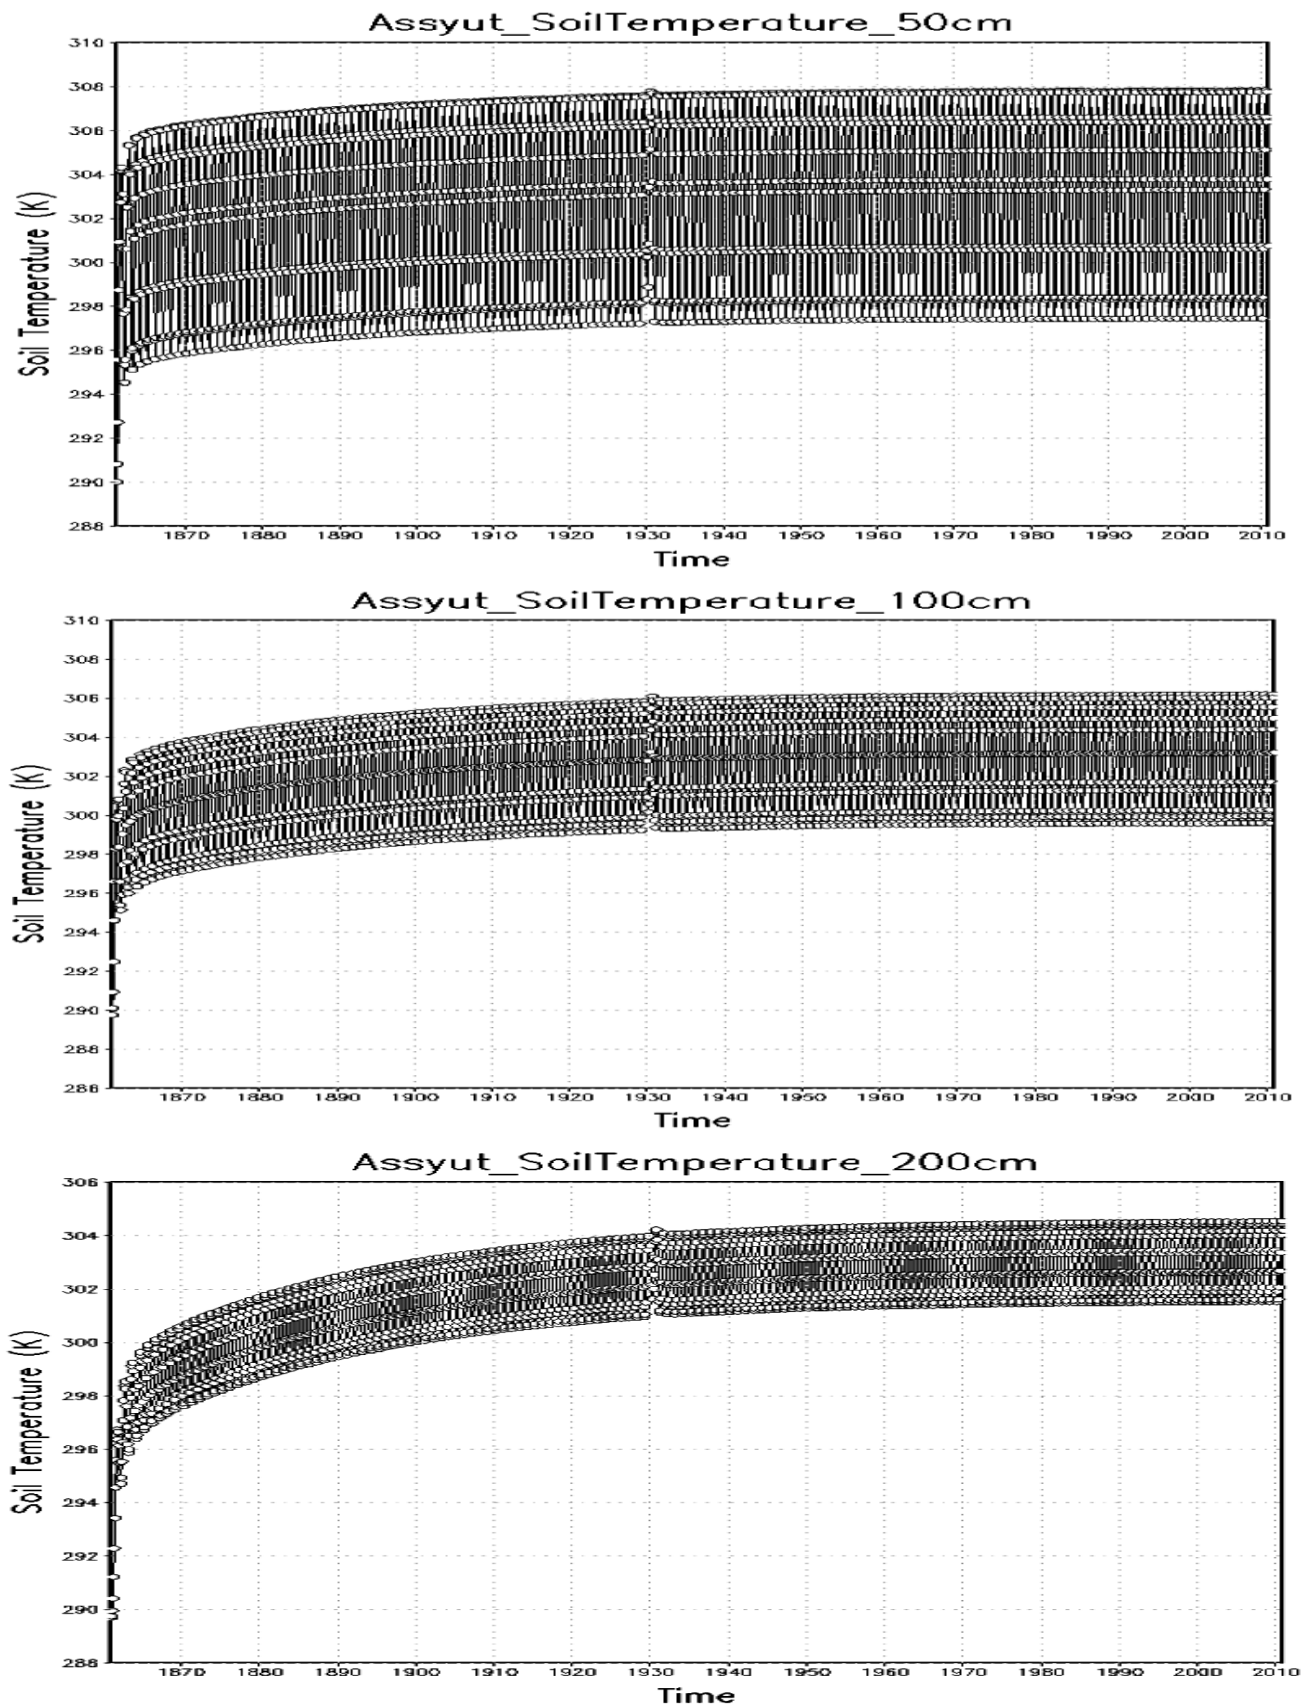

Figure S1 shows the monthly soil temperature (in °K) of Assyut during the spin-up phase (1861-2011). The upper panel for depth 50 cm; the middle panel for depth 100 cm and the lower panel for the depth 200 cm

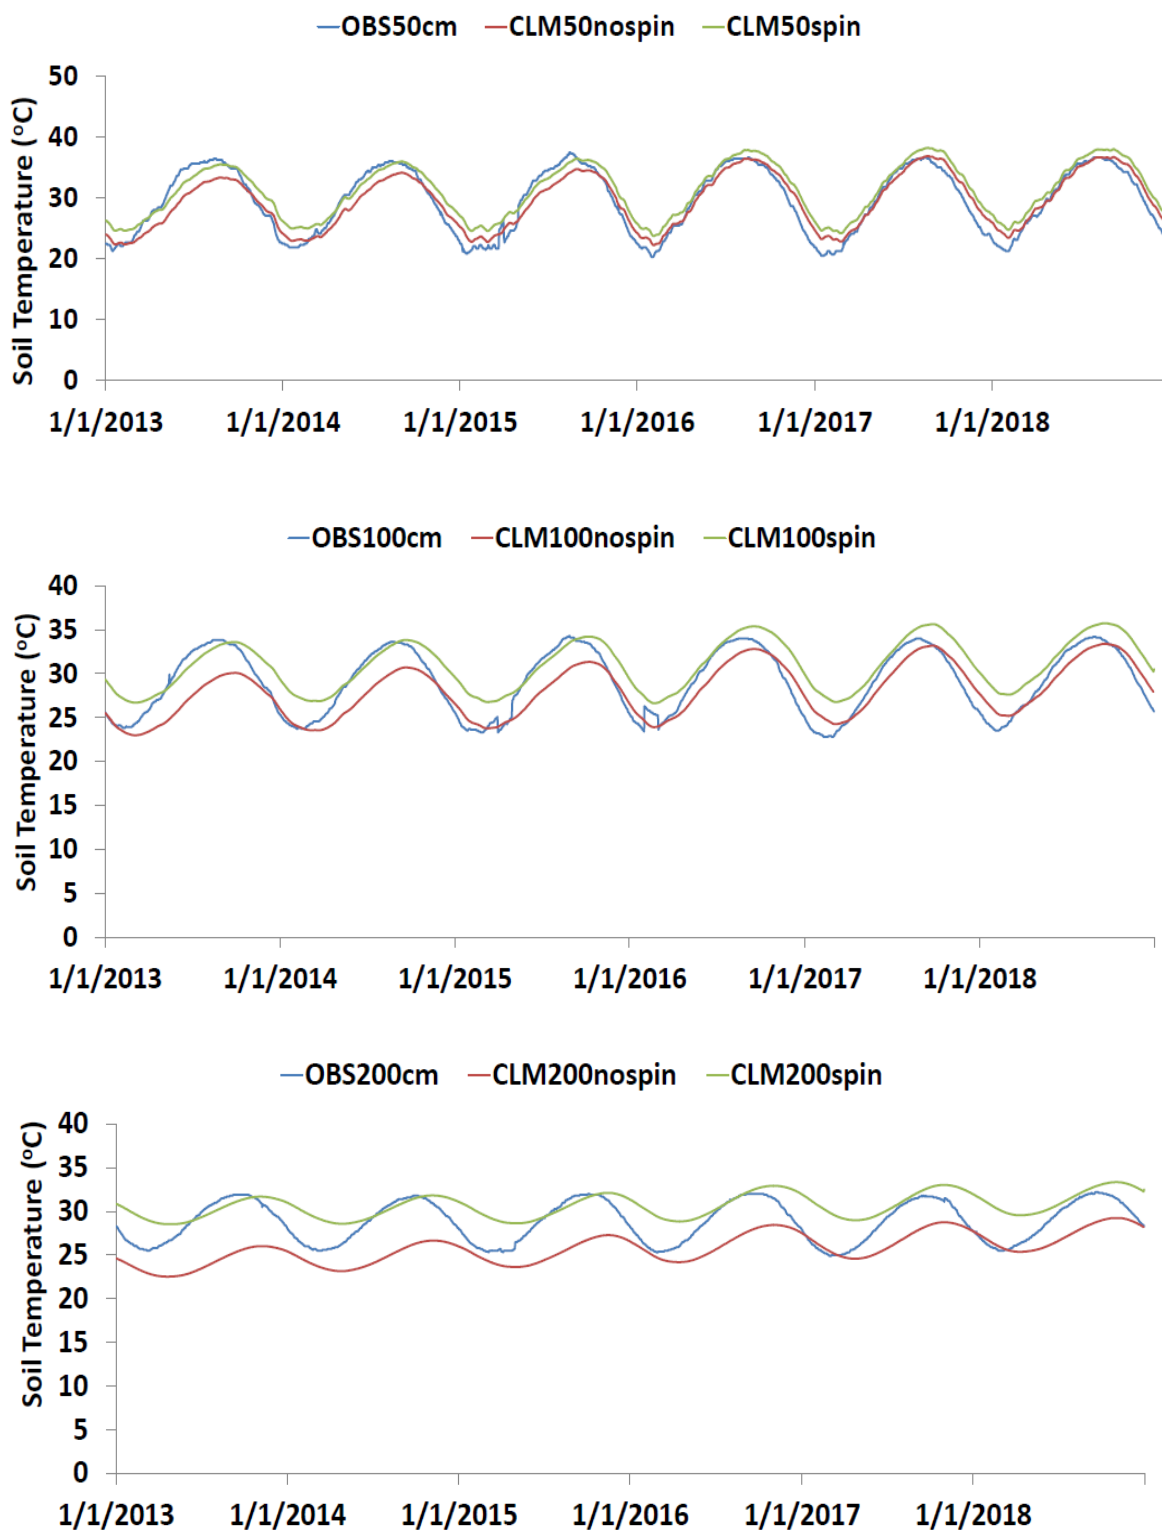

Figure S2 shows the daily soil temperature of Assyut (in °C) using arbitrary initial condition (no spin; in red) using a long term spin up file (spin; in green) against observation (OBS; in blue). The first panel is for depth 50 cm (top), third is for depth 100 cm (middle) and the fourth is for 200 cm (bottom). The unit is displayed in °C to match observations
